# Supplementary material for: Synthesis and Characterization of Bulky Substituted Hemihexaphyrazines Bearing 2,6-Diisopropylphenoxy Groups
Source: MDPI journal article supplement (doi:10.3390/molecules28155740), 2023-07-29
Supplement: s1 [file s1]

# Synthesis and characterization of bulky substituted hemihexaphyrazines bearing 2,6-diisopropylphenoxy groups

Evgenii N. Ivanov <sup>1,2</sup>, Verónica Almeida-Marrero <sup>3</sup>, Oskar I. Koifman <sup>1,2</sup>, Viktor V. Aleksandriiskii <sup>1,2</sup>, Tomas Torres, <sup>3, 4, 5, \*</sup> and Mikhail K. Islyaikin <sup>1, 2, \*</sup>

<sup>1</sup> IRLon, Research Institute of Macroheterocycles, Ivanovo State University of Chemistry and Technology, 7, Sheremetievskiy Ave., 153000 Ivanovo, Russia; ivanov.isuct@gmail.com (E.N.I.); oik@isuct.ru (O.I.K.), nmr@isuct.ru (V.V.A.)

<sup>2</sup> G. A. Krestov Institute of Solution Chemistry of the Russian Academy of Sciences, 1 Akademicheskaya Str., 153045 Ivanovo, Russian Federation

<sup>3</sup> Department of Organic Chemistry, Autonoma University of Madrid, Cantoblanco, 28049 Madrid, Spain; tomas.torres@uam.es

<sup>4</sup> Institute for Advanced Research in Chemical Sciences (IAdChem), Autonoma University of Madrid, 28049 Madrid, Spain

<sup>5</sup> Instituto Madrileño de Estudios Avanzados (IMDEA)-Nanociencia, c/ Faraday 9, Cantoblanco, 28049 Madrid, Spain

\* Correspondence: tomas.torres@uam.es (T.T.); mkimailster@gmail.com; Tel.: +79106847175 (M.K.I.)

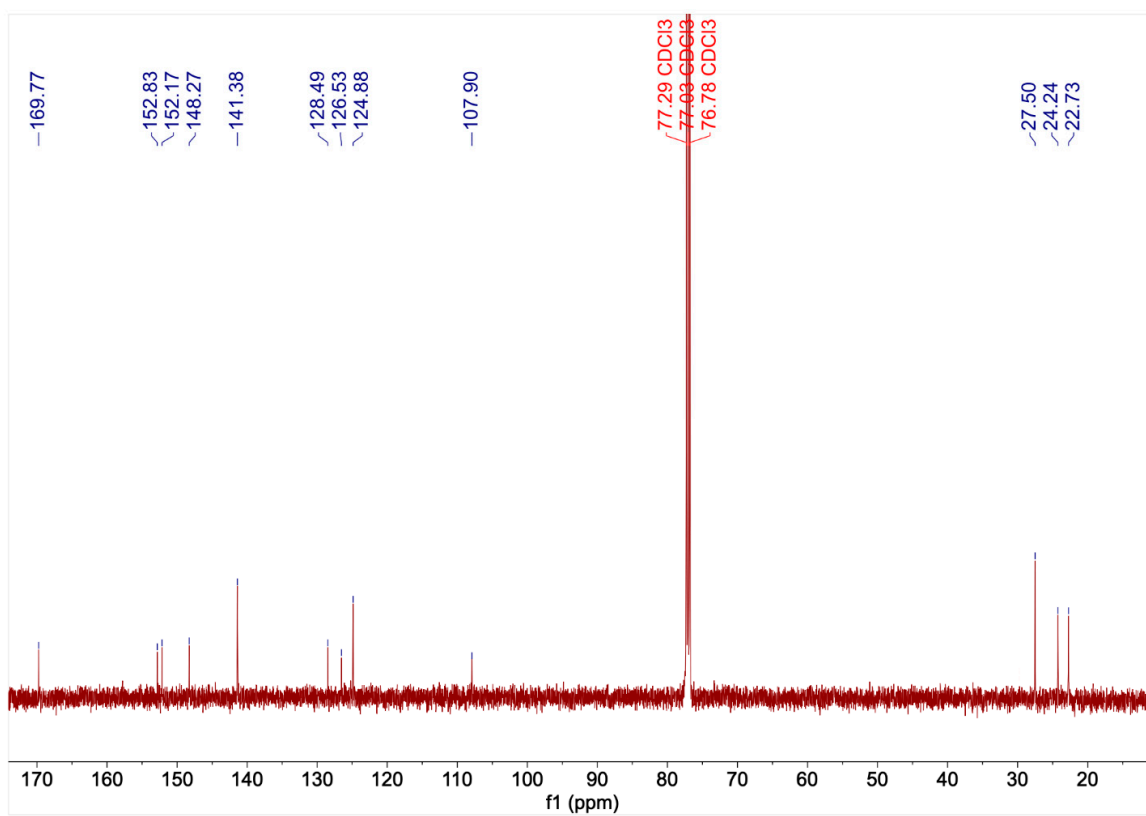

Figure S1: <sup>13</sup>C-NMR spectrum of **4** in CDCl<sub>3</sub>

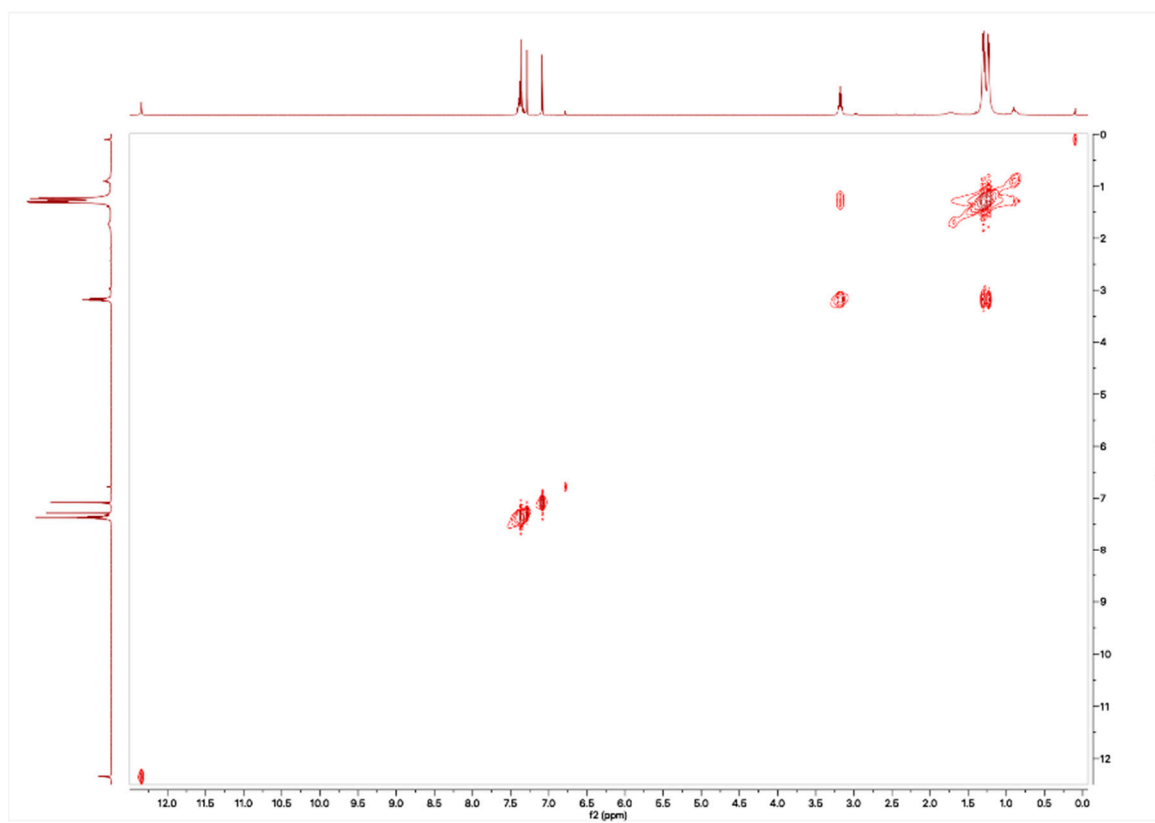

Figure S2: COSY <sup>1</sup>H-<sup>1</sup>H NMR spectrum of **4** in CDCl<sub>3</sub>

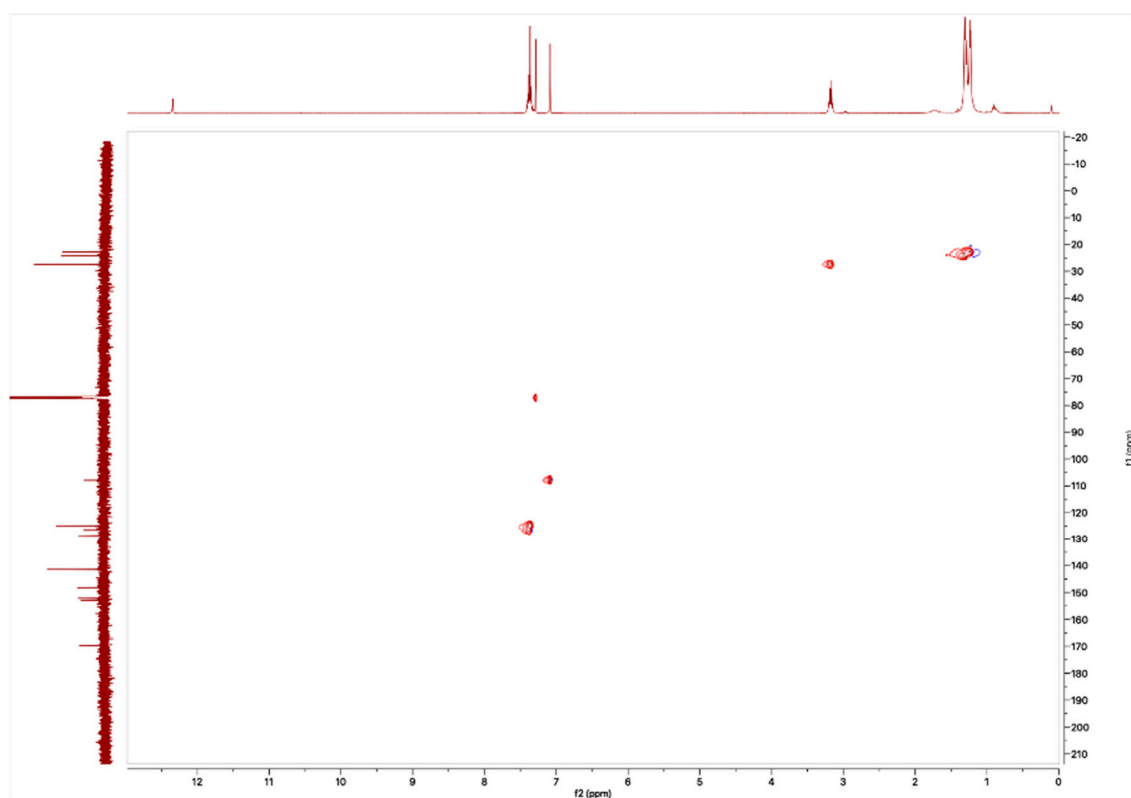

**Figure S3:** HSQC  $^1\text{H}$ - $^{13}\text{C}$  NMR spectrum of **4** in  $\text{CDCl}_3$

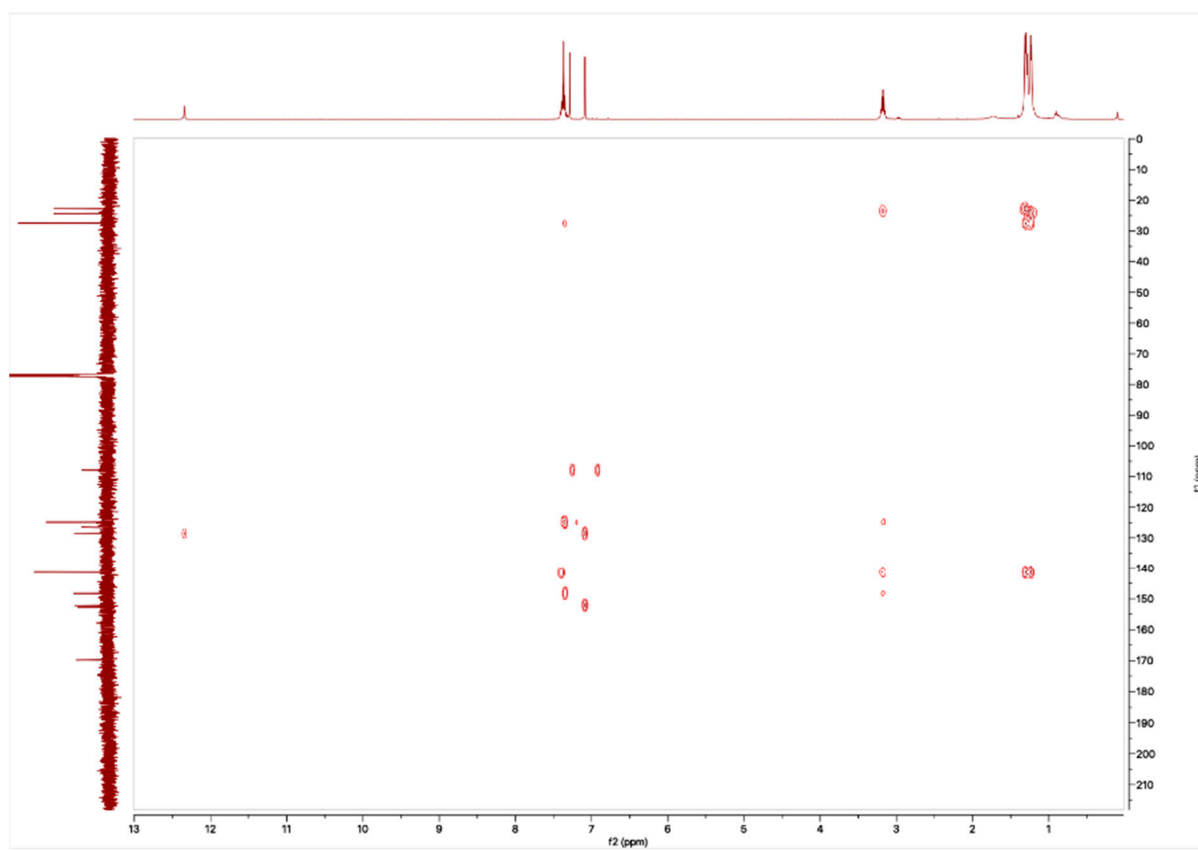

**Figure S4:** HMBC  $^1\text{H}$ - $^{13}\text{C}$  NMR spectrum of **4** in  $\text{CDCl}_3$

**Table S1.** Experimental ( $\delta_{\text{exp}}$ ) and computational ( $\delta_{\text{calc}}$ ) (GIAO) chemical shifts (**4**)  $^{13}\text{C}$  и  $^1\text{H}$

| C       | $\delta_{\text{exp}}$ | HSQC                   | HMBC  |      |      |                | $\delta_{\text{calc}}$ |
|---------|-----------------------|------------------------|-------|------|------|----------------|------------------------|
| 8,10    | 169.77                |                        |       |      |      |                | 171.35                 |
| 111,114 | 152.82                |                        | 12.34 |      |      |                | 151.84                 |
| 12,13   | 128.49                |                        | 12.34 | 7.08 |      |                | 129.03                 |
| 41      | 107.9                 | 7.08                   |       |      |      |                | 119.04                 |
| 42,43   | 152.17                |                        |       | 7.08 |      |                | 152.20                 |
| 44      | 107.9                 | 7.08                   |       |      |      |                | 119.04                 |
| 57      | 148.27                |                        | 7.35  |      |      |                | 151.37                 |
| 71,75   | 141.38                |                        | 7.38  | 3.2  | 1.31 | 1.24           | 138.13                 |
| 72      | 124.88                | 7.35                   | 7.38  |      |      |                | 129.78                 |
| 73      | 126.63                | 7.38                   |       |      |      |                | 122.53                 |
| 109,112 | 27.5                  | 3.18                   |       |      |      |                | 39.20                  |
| 110,113 | 24.24                 | 1.31                   |       | 3.2  | 1.24 |                | 24.72                  |
| 111,114 | 22.73                 | 1.24                   |       |      | 1.31 |                | 21.41                  |
|         |                       |                        |       |      |      | MAE*           | 1.696                  |
|         |                       |                        |       |      |      | R <sup>2</sup> | 0.992                  |
| H       | $\delta_{\text{exp}}$ | $\delta_{\text{calc}}$ |       |      |      |                |                        |
| 15      | 12.34                 | 12.03                  |       |      |      |                |                        |
| 41,44   | 7.08                  | 8.02                   |       |      |      |                |                        |
| 72,74   | 7.38                  | 7.31                   |       |      |      |                |                        |
| 73      | 7.35                  | 7.32                   |       |      |      |                |                        |
| 109,112 | 3.18                  | 3.07                   |       |      |      |                |                        |
| 110,113 | 1.31                  | 1.13                   |       |      |      |                |                        |
| 111,114 | 1.24                  | 0.94                   |       |      |      |                |                        |
|         | MAE                   | 0.070                  |       |      |      |                |                        |
|         | R <sup>2</sup>        | 0.984                  |       |      |      |                |                        |

$$*MAE = \frac{\sum_{i=1}^n |\delta_{\text{exp}} - \delta_{\text{calc}}|_i}{n}$$

R<sup>2</sup> - linear correlation coefficient

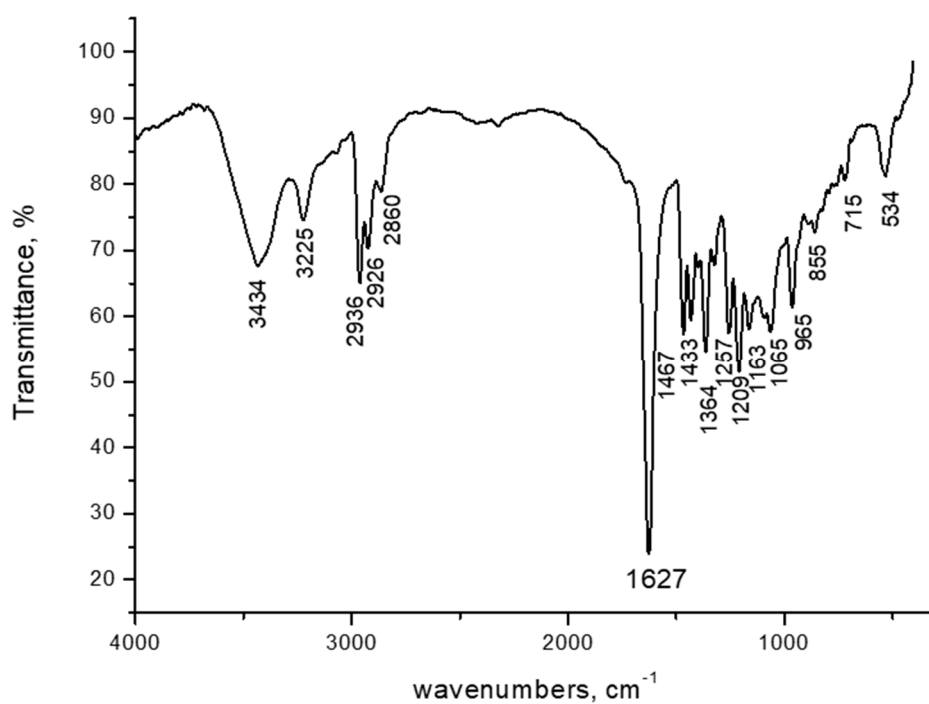

**Figure S5:** IR spectrum of **3** in palette with KBr

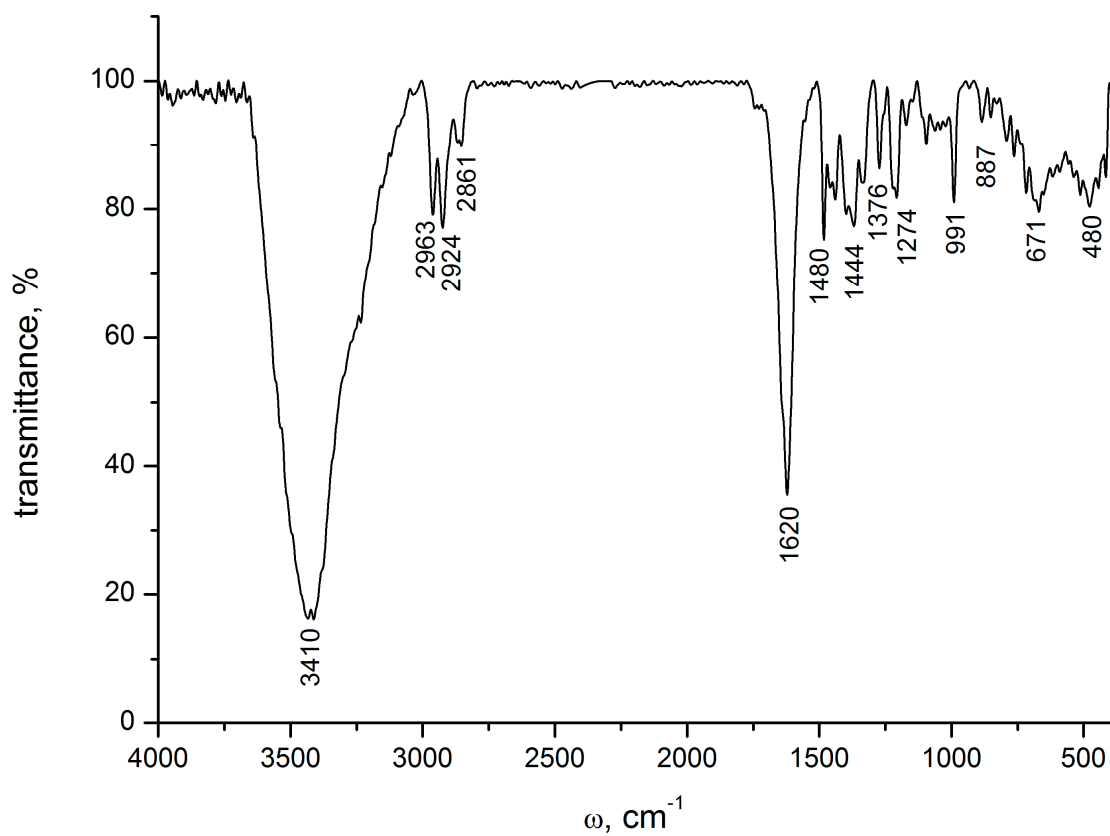

**Figure S6:** IR spectrum of **4** in palette with KBr

**Table S2.** a) Geometry parameters (Å) and  $E_{\text{tot}}$  (a.u.) of **4** optimized at DFT/CAM-B3LYP/6-31G(d,p) method

|   |              |              |              |
|---|--------------|--------------|--------------|
| N | 0.605448000  | -2.673510000 | -0.002625000 |
| C | -1.560122000 | -4.515174000 | -0.000713000 |
| C | -3.482671000 | -3.267893000 | 0.002053000  |
| N | -2.098696000 | -3.239990000 | 0.000266000  |
| C | -3.865660000 | -4.687591000 | -0.000951000 |
| C | -2.700530000 | -5.443600000 | 0.002808000  |
| N | -0.331588000 | -4.888084000 | -0.001851000 |
| N | -4.324003000 | -2.298088000 | 0.003052000  |
| C | -3.126561000 | 3.609806000  | 0.005296000  |
| C | -1.085203000 | 4.651364000  | 0.000148000  |
| N | -1.752902000 | 3.438811000  | 0.002962000  |
| C | -2.123373000 | 5.692824000  | -0.002850000 |
| C | -3.360524000 | 5.061538000  | 0.006341000  |
| N | 0.175319000  | 4.895101000  | -0.001833000 |
| N | -4.063621000 | 2.732153000  | 0.008185000  |
| C | 4.692525000  | 0.903613000  | 0.003210000  |
| C | 4.574211000  | -1.385062000 | -0.004776000 |
| N | 3.857768000  | -0.200616000 | -0.000378000 |
| C | 6.066816000  | 0.380532000  | 0.005047000  |
| C | 5.995160000  | -1.006481000 | -0.006090000 |
| N | 4.401012000  | 2.153946000  | 0.006483000  |
| N | 4.155118000  | -2.598624000 | -0.008892000 |
| C | -3.911468000 | -0.993050000 | 0.004555000  |
| C | -3.788051000 | 1.391475000  | 0.006622000  |
| S | -5.116197000 | 0.264759000  | 0.007252000  |
| N | -2.684106000 | -0.539344000 | 0.003531000  |
| C | 1.099131000  | 3.885189000  | 0.000688000  |
| S | 2.790823000  | 4.299376000  | 0.002789000  |
| N | 2.014590000  | 1.858223000  | 0.002948000  |
| C | 3.102232000  | 2.585760000  | 0.004112000  |
| C | 0.691785000  | -3.979198000 | -0.003905000 |
| S | 2.331600000  | -4.566122000 | -0.007489000 |
| N | 1.812026000  | -2.057833000 | -0.004304000 |
| C | 2.818636000  | -2.893911000 | -0.006772000 |
| H | -1.542936000 | -2.383517000 | -0.000177000 |
| H | -1.288914000 | 2.529342000  | 0.003136000  |
| H | 2.838142000  | -0.147909000 | -0.000131000 |
| C | -2.757082000 | -6.818395000 | 0.049570000  |
| C | -3.998443000 | -7.464640000 | 0.088229000  |
| C | -5.182606000 | -6.696295000 | -0.084705000 |
| C | -5.098168000 | -5.299440000 | -0.046605000 |
| C | -2.037477000 | 7.065940000  | -0.053333000 |
| C | -3.205335000 | 7.837233000  | -0.090493000 |
| C | -4.462045000 | 7.196175000  | 0.088660000  |
| C | -4.522789000 | 5.797947000  | 0.054255000  |
| C | 7.141683000  | -1.767089000 | -0.055988000 |
| C | 8.393516000  | -1.141135000 | -0.090375000 |
| C | 8.466132000  | 0.267589000  | 0.090639000  |
| C | 7.285457000  | 1.019047000  | 0.055526000  |
| N | 0.878182000  | 2.595433000  | 0.001271000  |

|   |              |              |              |
|---|--------------|--------------|--------------|
| N | -2.614096000 | 0.813439000  | 0.004548000  |
| H | -1.857481000 | -7.419748000 | 0.086790000  |
| H | -6.013856000 | -4.722824000 | -0.082889000 |
| H | -1.080605000 | 7.570892000  | -0.094903000 |
| H | -5.493201000 | 5.319468000  | 0.094800000  |
| H | 7.100768000  | -2.848200000 | -0.098677000 |
| H | 7.356015000  | 2.098631000  | 0.098306000  |
| O | 9.588851000  | 1.039242000  | 0.189961000  |
| C | 10.673171000 | 0.835304000  | 1.037623000  |
| C | 11.931544000 | 1.035754000  | 0.447719000  |
| C | 10.530892000 | 0.609177000  | 2.424789000  |
| C | 13.056945000 | 0.744510000  | 1.221692000  |
| C | 11.701772000 | 0.342779000  | 3.138740000  |
| H | 14.036845000 | 0.841785000  | 0.763955000  |
| H | 11.619825000 | 0.141786000  | 4.202425000  |
| C | 12.953047000 | 0.359264000  | 2.545076000  |
| H | 13.840433000 | 0.131647000  | 3.126240000  |
| C | 9.272191000  | 0.800819000  | 3.280400000  |
| H | 9.669923000  | 0.819203000  | 4.300385000  |
| C | 8.226533000  | -0.322004000 | 3.294039000  |
| C | 8.639082000  | 2.180695000  | 3.069313000  |
| H | 9.381170000  | 2.971632000  | 3.205629000  |
| H | 8.211493000  | 2.292739000  | 2.074141000  |
| H | 7.836209000  | 2.339250000  | 3.795197000  |
| H | 7.621606000  | -0.359666000 | 2.390602000  |
| H | 7.544233000  | -0.158598000 | 4.133765000  |
| H | 8.693513000  | -1.299967000 | 3.432645000  |
| C | 12.224753000 | 1.661542000  | -0.921021000 |
| H | 12.976756000 | 1.013288000  | -1.386180000 |
| C | 12.873474000 | 3.040245000  | -0.695706000 |
| C | 11.092749000 | 1.828661000  | -1.934463000 |
| H | 10.581952000 | 0.892947000  | -2.140985000 |
| H | 10.353263000 | 2.557814000  | -1.598264000 |
| H | 11.522088000 | 2.193114000  | -2.873282000 |
| H | 12.161870000 | 3.722371000  | -0.220117000 |
| H | 13.170693000 | 3.479074000  | -1.652828000 |
| H | 13.758615000 | 2.986858000  | -0.058656000 |
| O | 9.431364000  | -2.023822000 | -0.188946000 |
| C | 10.530334000 | -1.933130000 | -1.037393000 |
| C | 11.761514000 | -2.262741000 | -0.448044000 |
| C | 10.411632000 | -1.693510000 | -2.424509000 |
| C | 12.910643000 | -2.089461000 | -1.222514000 |
| C | 11.603518000 | -1.549382000 | -3.138875000 |
| H | 13.875416000 | -2.287848000 | -0.765298000 |
| H | 11.542332000 | -1.341003000 | -4.202534000 |
| C | 12.846628000 | -1.695205000 | -2.545793000 |
| H | 13.752549000 | -1.560507000 | -3.127324000 |
| C | 9.139791000  | -1.755314000 | -3.279953000 |
| H | 9.533488000  | -1.815138000 | -4.299909000 |
| C | 8.214890000  | -0.531082000 | -3.294453000 |
| C | 8.368345000  | -3.062710000 | -3.067986000 |
| H | 9.025515000  | -3.925774000 | -3.202550000 |
| H | 7.930485000  | -3.129083000 | -2.073191000 |

|   |              |               |              |
|---|--------------|---------------|--------------|
| H | 7.554159000  | -3.139030000  | -3.794585000 |
| H | 7.617110000  | -0.430832000  | -2.391056000 |
| H | 7.519346000  | -0.624294000  | -4.134044000 |
| H | 8.779720000  | 0.393687000   | -3.433882000 |
| C | 11.989189000 | -2.916037000  | 0.920332000  |
| H | 12.804127000 | -2.348893000  | 1.385425000  |
| C | 12.492449000 | -4.354077000  | 0.694133000  |
| C | 10.846502000 | -2.966291000  | 1.934330000  |
| H | 10.435333000 | -1.983032000  | 2.142239000  |
| H | 10.035419000 | -3.614684000  | 1.597769000  |
| H | 11.236332000 | -3.374279000  | 2.872476000  |
| H | 11.713933000 | -4.959275000  | 0.219260000  |
| H | 12.744028000 | -4.821370000  | 1.650863000  |
| H | 13.377684000 | -4.391882000  | 0.056093000  |
| O | -3.892206000 | -8.822981000  | 0.183626000  |
| C | -4.610160000 | -9.661704000  | 1.030476000  |
| C | -5.072631000 | -10.847497000 | 0.437558000  |
| C | -4.727208000 | -9.430960000  | 2.419221000  |
| C | -5.886171000 | -11.677284000 | 1.212268000  |
| C | -5.541980000 | -10.312463000 | 3.133729000  |
| H | -6.297559000 | -12.571020000 | 0.752741000  |
| H | -5.669026000 | -10.145161000 | 4.198819000  |
| C | -6.159759000 | -11.399848000 | 2.538420000  |
| H | -6.799522000 | -12.055189000 | 3.120010000  |
| C | -3.925421000 | -8.441597000  | 3.274250000  |
| H | -4.103569000 | -8.798553000  | 4.293950000  |
| C | -4.373100000 | -6.974086000  | 3.295164000  |
| C | -2.415294000 | -8.584870000  | 3.054653000  |
| H | -2.102118000 | -9.623731000  | 3.187148000  |
| H | -2.109487000 | -8.269159000  | 2.058401000  |
| H | -1.871648000 | -7.971133000  | 3.778839000  |
| H | -4.106067000 | -6.428401000  | 2.392671000  |
| H | -3.886678000 | -6.468547000  | 4.134920000  |
| H | -5.452951000 | -6.888861000  | 3.438068000  |
| C | -4.687927000 | -11.408620000 | -0.936552000 |
| H | -5.629724000 | -11.726947000 | -1.398948000 |
| C | -3.824698000 | -12.666354000 | -0.723633000 |
| C | -3.976752000 | -10.509991000 | -1.948062000 |
| H | -4.527560000 | -9.595609000  | -2.147133000 |
| H | -2.972579000 | -10.241571000 | -1.614638000 |
| H | -3.882895000 | -11.059295000 | -2.890395000 |
| H | -2.874014000 | -12.399819000 | -0.251378000 |
| H | -3.601192000 | -13.138477000 | -1.684948000 |
| H | -4.314466000 | -13.407384000 | -0.088711000 |
| O | -6.466338000 | -7.153895000  | -0.176445000 |
| C | -6.944571000 | -8.143741000  | -1.029182000 |
| C | -7.846317000 | -9.045163000  | -0.440705000 |
| C | -6.683711000 | -8.154599000  | -2.417573000 |
| C | -8.277893000 | -10.121478000 | -1.218836000 |
| C | -7.161567000 | -9.253796000  | -3.135362000 |
| H | -8.932950000 | -10.857667000 | -0.762608000 |
| H | -6.955139000 | -9.300320000  | -4.200142000 |
| C | -7.910381000 | -10.257888000 | -2.544332000 |



|   |               |               |              |
|---|---------------|---------------|--------------|
| H | -8.251955000  | -11.105720000 | -3.128727000 |
| C | -6.102403000  | -7.019699000  | -3.270565000 |
| H | -6.354997000  | -7.326543000  | -4.290825000 |
| C | -4.579625000  | -6.832667000  | -3.290103000 |
| C | -6.847107000  | -5.698092000  | -3.051176000 |
| H | -7.923344000  | -5.833870000  | -3.185875000 |
| H | -6.684764000  | -5.291089000  | -2.054324000 |
| H | -6.505720000  | -4.951368000  | -3.774032000 |
| H | -4.189668000  | -6.369112000  | -2.386506000 |
| H | -4.315022000  | -6.180947000  | -4.128326000 |
| H | -4.063083000  | -7.784428000  | -3.435220000 |
| C | -8.520268000  | -8.920292000  | 0.930908000  |
| H | -8.438628000  | -9.912461000  | 1.390305000  |
| C | -10.016980000 | -8.630189000  | 0.711651000  |
| C | -7.984832000  | -7.913248000  | 1.948541000  |
| H | -6.927458000  | -8.053888000  | 2.151614000  |
| H | -8.138346000  | -6.884186000  | 1.618383000  |
| H | -8.530059000  | -8.050156000  | 2.887968000  |
| H | -10.149809000 | -7.650360000  | 0.242440000  |
| H | -10.543951000 | -8.617463000  | 1.670364000  |
| H | -10.497414000 | -9.372726000  | 0.071351000  |
| O | -2.959041000  | 9.177013000   | -0.190282000 |
| C | -3.589396000  | 10.083179000  | -1.037380000 |
| C | -3.923088000  | 11.312637000  | -0.446914000 |
| C | -3.736116000  | 9.861374000   | -2.424753000 |
| C | -4.649320000  | 12.220115000  | -1.221234000 |
| C | -4.458184000  | 10.820541000  | -3.138991000 |
| H | -4.962989000  | 13.153462000  | -0.763369000 |
| H | -4.606820000  | 10.663992000  | -4.202917000 |
| C | -4.956609000  | 11.968272000  | -2.545122000 |
| H | -5.527315000  | 12.684784000  | -3.126436000 |
| C | -3.044916000  | 8.791742000   | -3.279773000 |
| H | -3.189138000  | 9.162570000   | -4.299878000 |
| C | -3.642352000  | 7.378513000   | -3.294630000 |
| C | -1.527212000  | 8.778051000   | -3.066069000 |
| H | -1.108711000  | 9.778840000   | -3.200750000 |
| H | -1.251774000  | 8.432858000   | -2.070707000 |
| H | -1.052912000  | 8.110936000   | -3.791777000 |
| H | -3.430717000  | 6.810839000   | -2.391023000 |
| H | -3.213412000  | 6.822730000   | -4.133961000 |
| H | -4.725619000  | 7.405301000   | -3.434439000 |
| C | -3.474673000  | 11.835695000  | 0.922941000  |
| H | -4.375526000  | 12.253108000  | 1.388039000  |
| C | -2.485295000  | 12.994985000  | 0.700348000  |
| C | -2.856792000  | 10.871616000  | 1.935509000  |
| H | -3.499560000  | 10.021010000  | 2.141458000  |
| H | -1.888020000  | 10.497754000  | 1.598990000  |
| H | -2.701126000  | 11.412056000  | 2.874781000  |
| H | -1.569932000  | 12.628039000  | 0.225666000  |
| H | -2.209220000  | 13.445449000  | 1.658392000  |
| H | -2.897517000  | 13.780355000  | 0.063652000  |
| O | -5.691408000  | 7.784070000   | 0.183940000  |
| C | -6.060233000  | 8.821700000   | 1.034367000  |

|   |              |              |              |
|---|--------------|--------------|--------------|
| C | -6.865258000 | 9.810317000  | 0.445704000  |
| C | -5.794123000 | 8.810049000  | 2.421724000  |
| C | -7.178647000 | 10.928708000 | 1.221086000  |
| C | -6.151302000 | 9.955815000  | 3.136908000  |
| H | -7.754904000 | 11.727783000 | 0.764349000  |
| H | -5.936799000 | 9.984292000  | 4.200734000  |
| C | -6.793304000 | 11.030653000 | 2.544624000  |
| H | -7.041838000 | 11.911655000 | 3.126921000  |
| C | -5.330907000 | 7.623650000  | 3.276970000  |
| H | -5.547466000 | 7.958100000  | 4.296835000  |
| C | -3.835486000 | 7.280610000  | 3.293097000  |
| C | -6.208557000 | 6.385249000  | 3.063963000  |
| H | -7.264933000 | 6.632292000  | 3.197692000  |
| H | -6.089394000 | 5.958677000  | 2.069215000  |
| H | -5.946126000 | 5.610745000  | 3.790570000  |
| H | -3.497454000 | 6.779182000  | 2.388803000  |
| H | -3.637426000 | 6.605293000  | 4.131013000  |
| H | -3.223303000 | 8.174133000  | 3.436515000  |
| C | -7.554100000 | 9.751342000  | -0.922954000 |
| H | -7.372058000 | 10.728080000 | -1.386593000 |
| C | -9.071918000 | 9.618617000  | -0.697008000 |
| C | -7.130048000 | 8.690561000  | -1.938489000 |
| H | -6.064593000 | 8.720110000  | -2.146018000 |
| H | -7.387969000 | 7.684144000  | -1.603629000 |
| H | -7.661956000 | 8.879803000  | -2.876471000 |
| H | -9.303491000 | 8.659646000  | -0.223079000 |
| H | -9.601284000 | 9.656726000  | -1.653726000 |
| H | -9.470320000 | 10.409399000 | -0.058184000 |

$E_{\text{tot}} = -6418.125671$  a.u.

b) Geometry parameters (Å) and  $E_{\text{tot}}$  (a.u.) of **H<sub>3</sub>Hhp** optimized at DFT/CAM-B3LYP/6-31G(d,p) method of D<sub>3h</sub> symmetry.

|   |              |             |             |
|---|--------------|-------------|-------------|
| C | -1.194031000 | 3.855812000 | 0.000000000 |
| C | 1.194031000  | 3.855812000 | 0.000000000 |
| N | -0.677229000 | 2.653570000 | 0.000000000 |
| N | 0.677229000  | 2.653570000 | 0.000000000 |
| S | 0.000000000  | 5.123887000 | 0.000000000 |
| N | -2.518818000 | 4.199969000 | 0.000000000 |
| N | 2.518818000  | 4.199969000 | 0.000000000 |
| H | -2.457867000 | 1.419050000 | 0.000000000 |
| C | -6.961197000 | 2.380995000 | 0.000000000 |
| C | -7.633286000 | 3.600421000 | 0.000000000 |
| C | -5.577908000 | 2.417120000 | 0.000000000 |
| H | -8.718080000 | 3.613659000 | 0.000000000 |
| C | -6.934699000 | 4.810409000 | 0.000000000 |
| C | -4.882241000 | 3.622050000 | 0.000000000 |
| H | -7.488561000 | 5.743249000 | 0.000000000 |
| C | -5.542600000 | 4.838076000 | 0.000000000 |
| H | -4.987078000 | 5.768843000 | 0.000000000 |
| H | -7.489504000 | 1.434515000 | 0.000000000 |
| C | -3.443508000 | 3.308962000 | 0.000000000 |
| N | -3.342132000 | 1.929581000 | 0.000000000 |

|   |              |              |             |
|---|--------------|--------------|-------------|
| C | -4.587399000 | 1.327685000  | 0.000000000 |
| C | -2.742216000 | -2.961967000 | 0.000000000 |
| C | -3.936247000 | -0.893845000 | 0.000000000 |
| N | -1.959444000 | -1.913282000 | 0.000000000 |
| N | -2.636673000 | -0.740287000 | 0.000000000 |
| S | -4.437417000 | -2.561944000 | 0.000000000 |
| N | -2.377871000 | -4.281345000 | 0.000000000 |
| N | -4.896689000 | 0.081376000  | 0.000000000 |
| H | 0.000000000  | -2.838101000 | 0.000000000 |
| C | 1.418596000  | -7.219071000 | 0.000000000 |
| C | 0.698587000  | -8.410830000 | 0.000000000 |
| C | 0.695667000  | -6.039170000 | 0.000000000 |
| H | 1.229520000  | -9.356909000 | 0.000000000 |
| C | -0.698587000 | -8.410830000 | 0.000000000 |
| C | -0.695667000 | -6.039170000 | 0.000000000 |
| H | -1.229520000 | -9.356909000 | 0.000000000 |
| C | -1.418596000 | -7.219071000 | 0.000000000 |
| H | -2.502426000 | -7.203358000 | 0.000000000 |
| H | 2.502426000  | -7.203358000 | 0.000000000 |
| C | -1.143891000 | -4.636647000 | 0.000000000 |
| N | 0.000000000  | -3.859162000 | 0.000000000 |
| C | 1.143891000  | -4.636647000 | 0.000000000 |
| C | 3.936247000  | -0.893845000 | 0.000000000 |
| C | 2.742216000  | -2.961967000 | 0.000000000 |
| N | 2.636673000  | -0.740287000 | 0.000000000 |
| N | 1.959444000  | -1.913282000 | 0.000000000 |
| S | 4.437417000  | -2.561944000 | 0.000000000 |
| N | 4.896689000  | 0.081376000  | 0.000000000 |
| N | 2.377871000  | -4.281345000 | 0.000000000 |
| H | 2.457867000  | 1.419050000  | 0.000000000 |
| C | 5.542600000  | 4.838076000  | 0.000000000 |
| C | 6.934699000  | 4.810409000  | 0.000000000 |
| C | 4.882241000  | 3.622050000  | 0.000000000 |
| H | 7.488561000  | 5.743249000  | 0.000000000 |
| C | 7.633286000  | 3.600421000  | 0.000000000 |
| C | 5.577908000  | 2.417120000  | 0.000000000 |
| H | 8.718080000  | 3.613659000  | 0.000000000 |
| C | 6.961197000  | 2.380995000  | 0.000000000 |
| H | 7.489504000  | 1.434515000  | 0.000000000 |
| H | 4.987078000  | 5.768843000  | 0.000000000 |
| C | 4.587399000  | 1.327685000  | 0.000000000 |
| N | 3.342132000  | 1.929581000  | 0.000000000 |
| C | 3.443508000  | 3.308962000  | 0.000000000 |

E<sub>tot</sub>= -3167.103429 a.u.
